# Supplementary material for: Synergistic vacancy defects and mechanical strain for the modulation of the mechanical, electronic and optical properties of monolayer tungsten disulfide
Source: Royal Society of Chemistry journal article supplement (doi:10.1039/d0cp06336c), 2021-01-01
Supplement: d0cp06336c1.pdf [file d0cp06336c1.pdf]

**Electronic Supplementary Information for**  
**Synergistic vacancy defect and mechanical strain for the**  
**mechanical, electronic and optical properties modulation of**  
**monolayer tungsten disulfide**

Chan Gao<sup>1,2</sup>, Xiaoyong Yang<sup>3</sup>, Ming Jiang<sup>1</sup>, Lixin Chen<sup>1</sup>, Zhiwen Chen<sup>1</sup>, Chandra Veer Singh<sup>1,4,\*</sup>

*<sup>1</sup>Department of Materials Science and Engineering, University of Toronto, Toronto, ON M5S 3E4, Canada*

*<sup>2</sup>Institute of Nuclear Physics and Chemistry, China Academy of Engineering Physics, Mianyang 621900, China*

*<sup>3</sup>Condensed Matter Theory Group, Materials Theory Division, Department of Physics and Astronomy, Uppsala University, Uppsala 75120, Sweden*

*<sup>4</sup>Department of Mechanical and Industrial Engineering, University of Toronto, Toronto, ON M5S 3G8, Canada*

\* Correspondence and request for materials should be addressed to C.V. Singh (chandraveer.singh@utoronto.ca).

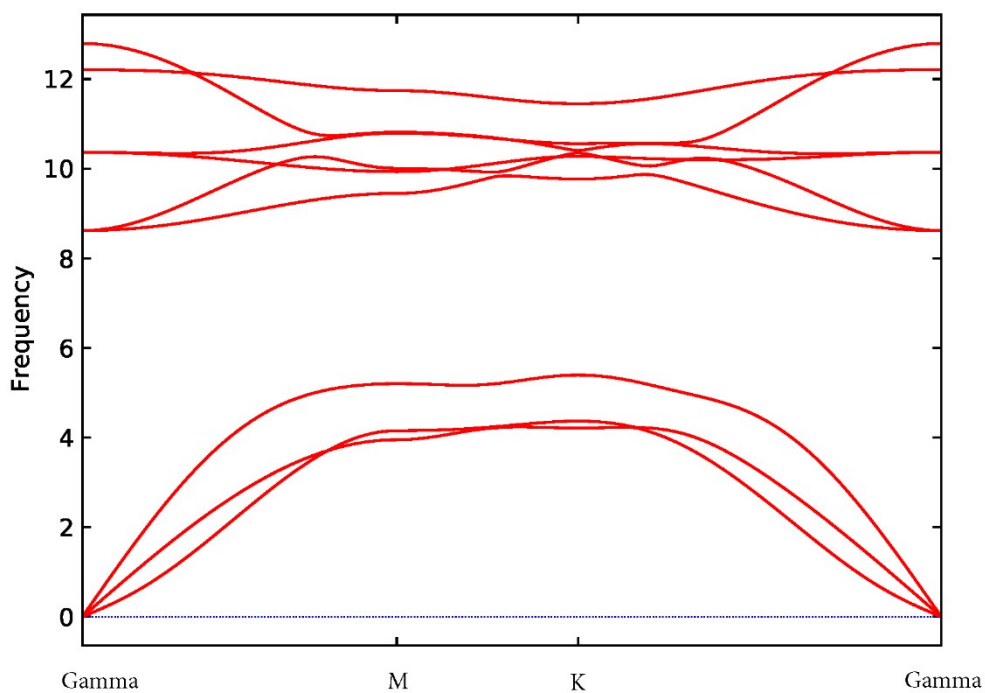

**Figure S1.** The phonon spectrum of pristine monolayer WS2.

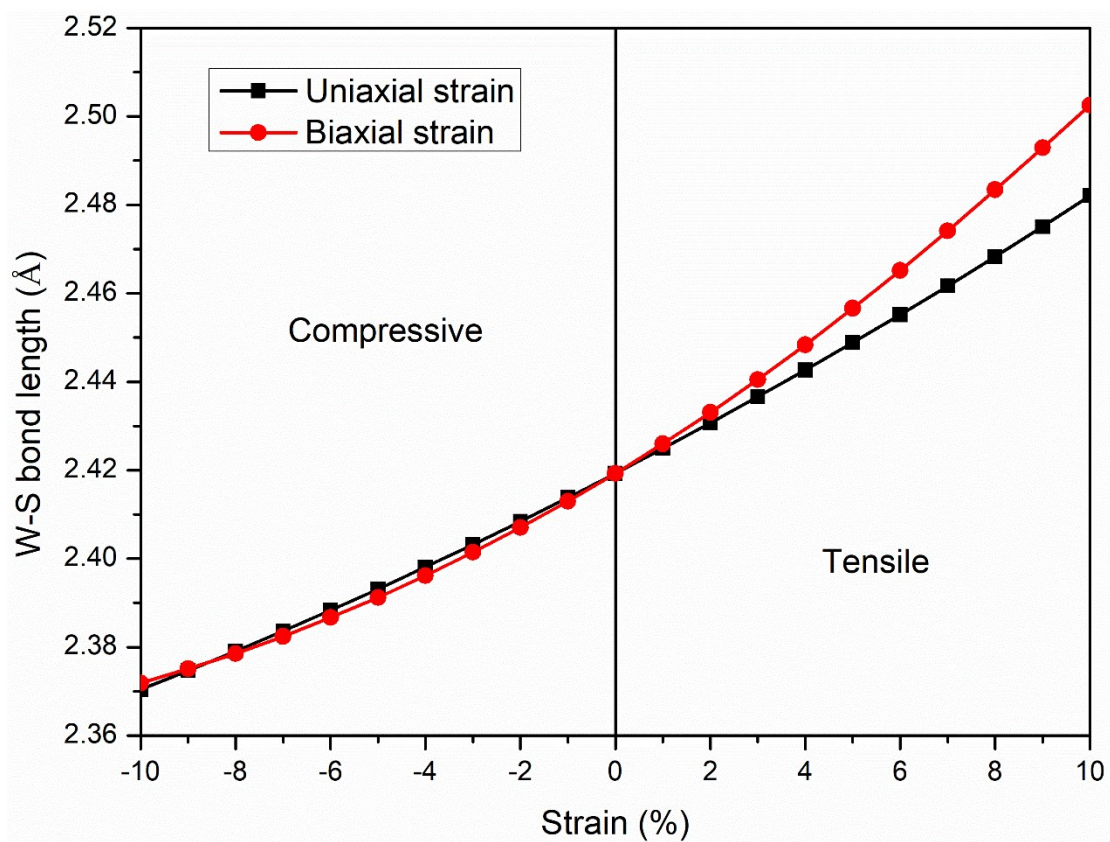

**Figure S2.** Variation of W-S bond length of pristine monolayer WS2 with applied

strain.

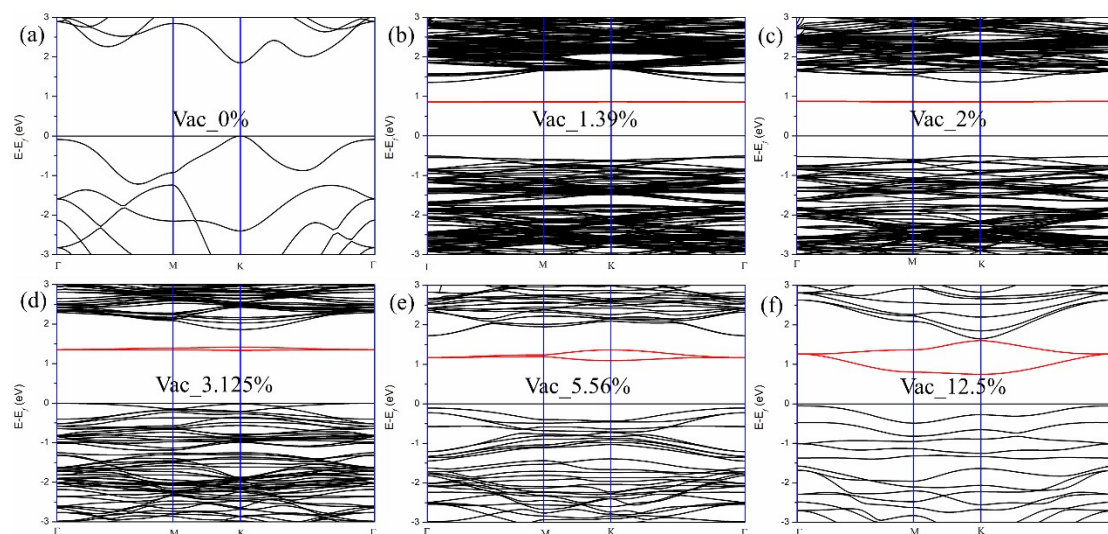

**Figure S3.** Electronic band structure of unstrained monolayer  $\text{WS}_2$  with different sulfur vacancy concentrations of (a) 0%, (b) 1.39%, (c) 2%, (d) 3.125%, (e) 5.56%, and (f) 12.5%, respectively. The defective states are highlighted with red lines, and the horizontal solid line indicates the Fermi level, which is set to 0 eV.

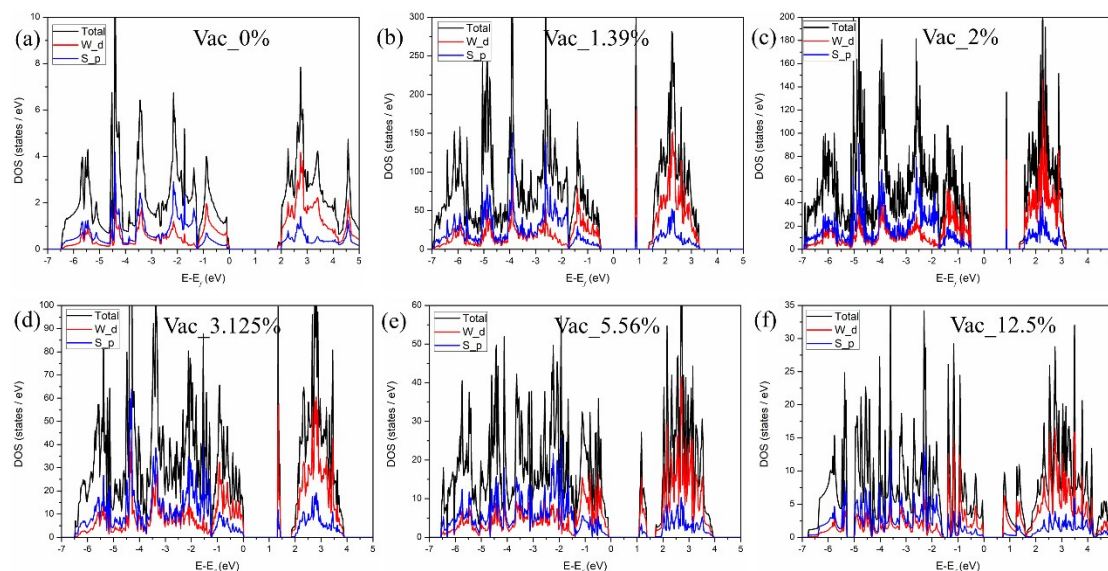

**Figure S4.** Electronic total (TDOS) and partial density of states (PDOS) of unstrained monolayer  $\text{WS}_2$  with different sulfur vacancy concentrations of (a) 0%, (b) 1.39%, (c) 2%, (d) 3.125%, (e) 5.56%, and (f) 12.5%, respectively.

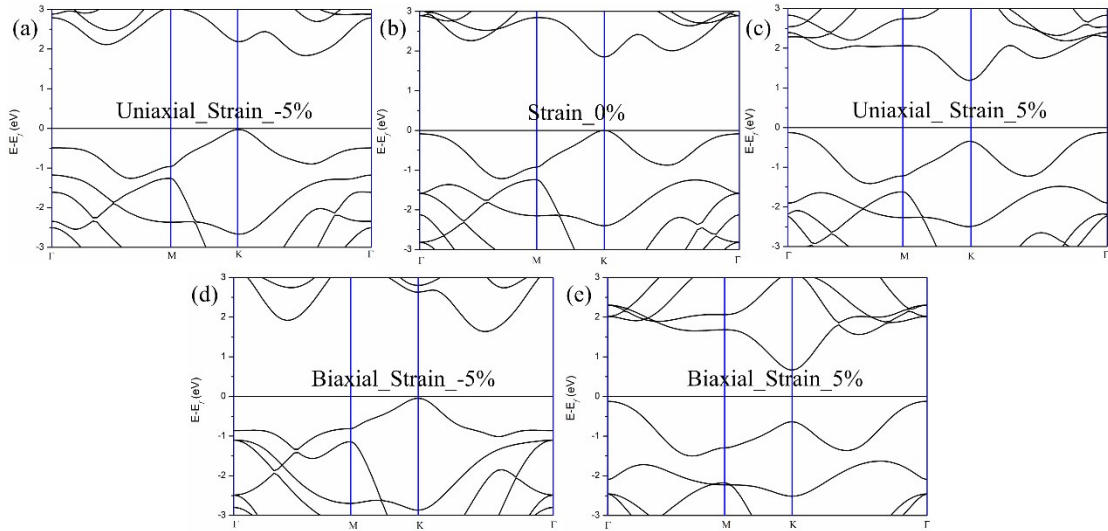

**Figure S5.** Electronic band structure of the pristine monolayer  $\text{WS}_2$  under different applied strains of (a) -5% uniaxial strain, (b) strain-free, (c) 5% uniaxial strain, (d) -5% biaxial strain and (e) 5% biaxial strain, respectively. The horizontal solid line indicates the Fermi level, which is set to 0 eV.

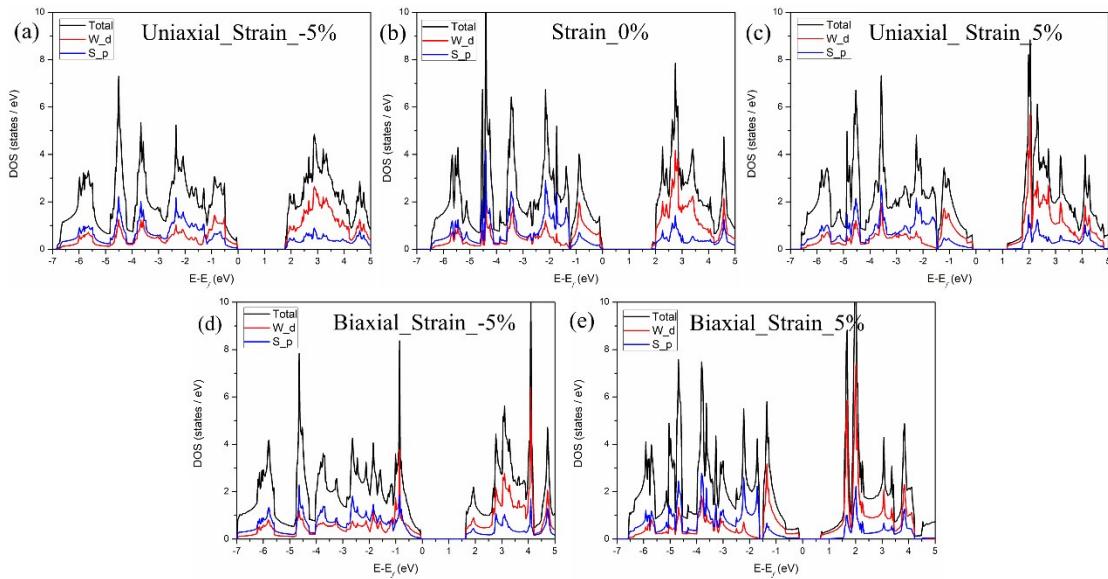

**Figure S6.** Electronic TDOS and PDOS of the pristine monolayer  $\text{WS}_2$  under different applied strains of (a) -5% uniaxial strain, (b) strain-free, (c) 5% uniaxial strain, (d) -5% biaxial strain and (e) 5% biaxial strain, respectively.

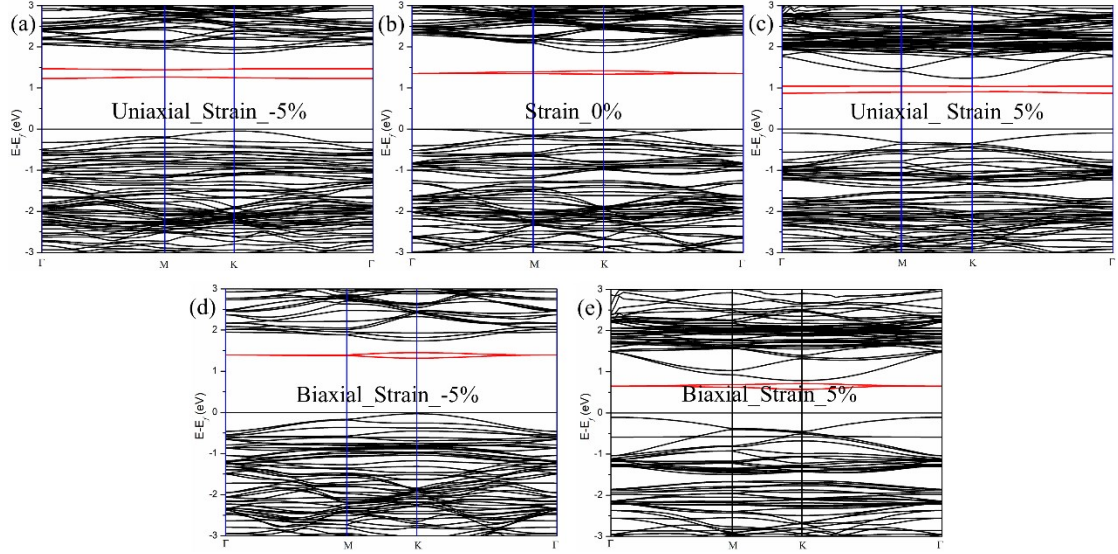

**Figure S7.** Electronic band structure of monolayer  $\text{WS}_2$  with sulfur vacancy concentration of 3.125% under different applied strains of (a) -5% uniaxial strain, (b) strain-free, (c) 5% uniaxial strain, (d) -5% biaxial strain and (e) 5% biaxial strain, respectively. The defective states are highlighted with red lines, and the horizontal solid line indicates the Fermi level, which is set to 0 eV.

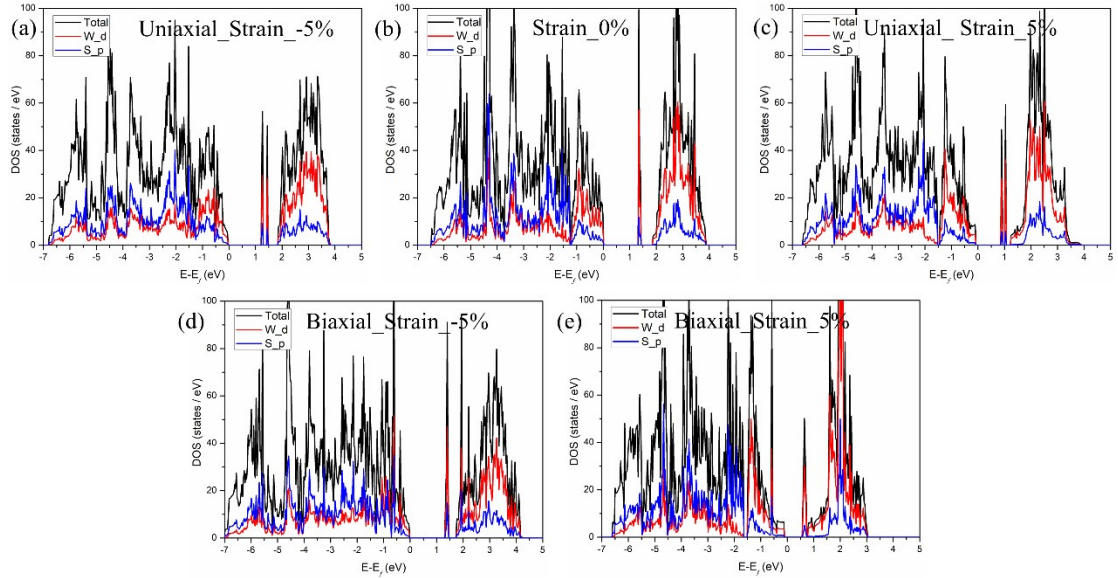

**Figure S8.** Electronic TDOS and PDOS of monolayer  $\text{WS}_2$  with sulfur vacancy concentration of 3.125% under different applied strains of (a) -5% uniaxial strain, (b) strain-free, (c) 5% uniaxial strain, (d) -5% biaxial strain and (e) 5% biaxial strain, respectively.
